# Supplementary material for: Non-invasive imaging reveals convergence in root and stem vulnerability to cavitation across five tree species
Source: PubMed Central journal article supplement (PMC7586747; doi:10.1093/jxb/eraa381), 2020-09-18
Supplement: eraa381_suppl_supplementary_file001.pdf [file eraa381_suppl_supplementary_file001.pdf]

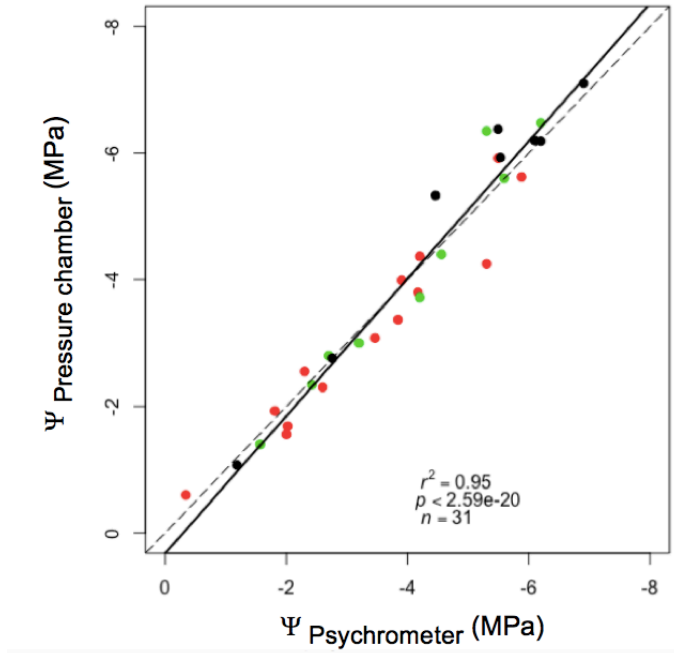

Supplementary Figure S1. Correlation between stem water potential measured with stems psychrometers and covered leaves in a pressure chamber for three species, *Eucalyptus saligna* (black circles), *Eucalyptus crebra* (black circles), *Quercus palustis* (green circles), during experimental dehydration. A standardized major axis model fit to pooled dataset (dashed line) did not differ from the 1:1 relationship (solid line).

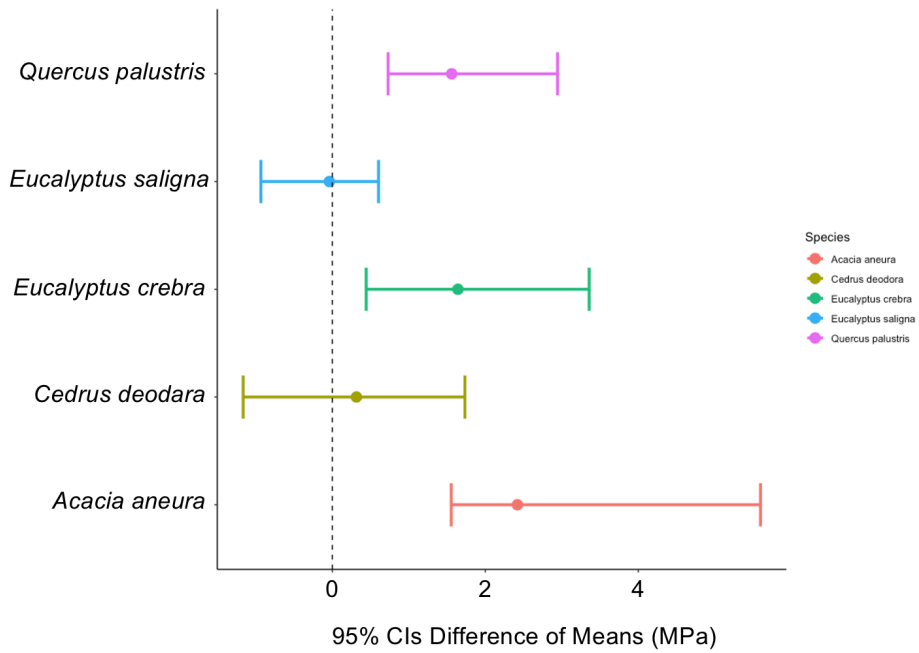

Figure S2. Difference of means for root and shoot P50 of five woody plant species. Bars show 95% confidence intervals for difference of means. Where 95% CIs overlap with zero, there is no significant difference between root and stem P50 for that species.

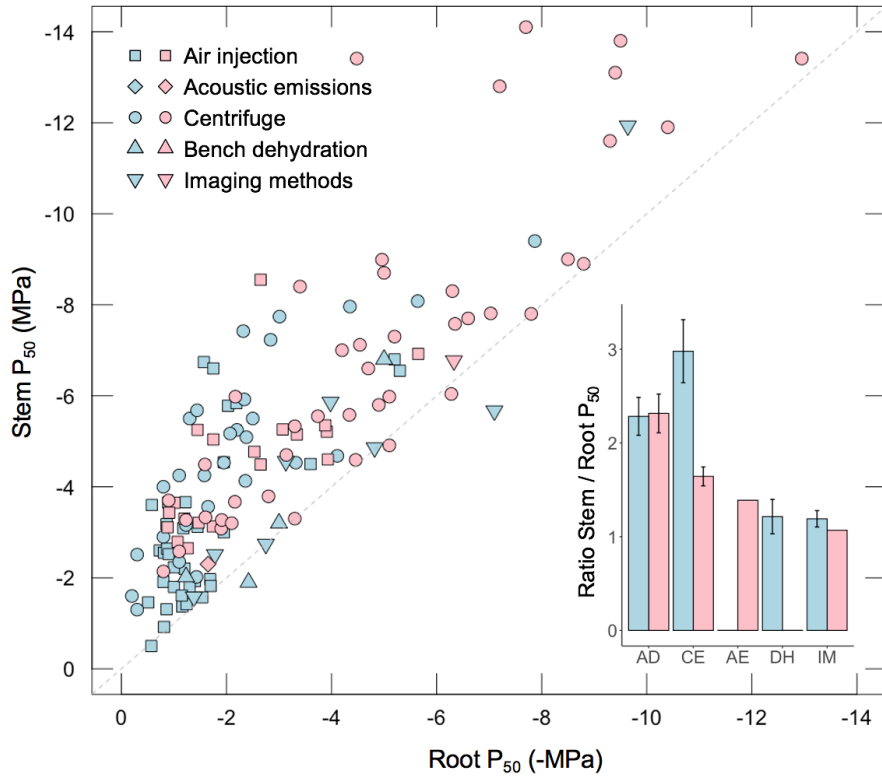

Figure S3. Data synthesis showing the relationship between stem and root  $P_{50}$  values based on previously published studies. Data are shown for a total of 87 species with 67 independent populations for angiosperms (blue) and 64 populations for conifers (pink) measured in studies published between 1994 and 2018. Within each group, methodology used to measure vulnerability is shown by symbol. The dashed line shows the 1:1 relationship. Inset shows the ratio stem to root  $P_{50}$  within a plant as a function of methodology (AD = air injection, CE = centrifuge, AE = acoustic emissions, DH = bench dehydration, IM = imaging methods). Data and references used in this analysis are provided in Table S1.

**Table S1.** Values of water potential at 50% loss of hydraulic conductivity ( $P_{50}$ ) for roots and stems, including method (DH = dehydration, CE = centrifuge, AD = air-injection, AE = acoustic emissions, IM=imaging) and wood porosity type (diffuse-porous, semi-ring-porous, ring porous, vesseless). Data were taken from the Xylem Functional Traits database (Choat et al. 2012), updated from papers published between 2012-present.

| Group      | Species                           | Root $P_{50}$<br>(MPa) | Stem $P_{50}$<br>(MPa) | Method | Porosity         | Reference                    |
|------------|-----------------------------------|------------------------|------------------------|--------|------------------|------------------------------|
| Angiosperm | <i>Acacia aneura</i>              | -9.64                  | -11.93                 | IM     | diffuse-porous   | Peters et al. in review      |
| Angiosperm | <i>Acer grandidentatum</i>        | -1.22                  | -3.66                  | AD     | diffuse-porous   | Alder et al. 1996            |
| Angiosperm | <i>Acer grandidentatum</i>        | -0.58                  | -3.60                  | AD     | diffuse-porous   | Alder et al. 1996            |
| Angiosperm | <i>Acer grandidentatum</i>        | -0.80                  | -4.00                  | CE     | diffuse-porous   | Sperry & Hacke 2004          |
| Angiosperm | <i>Acer monspessulanum</i>        | -1.57                  | -6.74                  | AD     | diffuse-porous   | Martinez-Vilalta et al. 2002 |
| Angiosperm | <i>Acer pseudoplatanus</i>        | -1.78                  | -2.51                  | IM     | diffuse-porous   | Losso et al. 2019            |
| Angiosperm | <i>Acer rubrum</i>                | -1.69                  | -1.97                  | AD     | diffuse-porous   | Maherali et al. 2006         |
| Angiosperm | <i>Acer saccharum</i>             | -2.42                  | -1.90                  | DH     | diffuse-porous   | Tsuda & Tyree 1997           |
| Angiosperm | <i>Alnus glutinosa</i>            | -1.20                  | -2.20                  | AD     | diffuse-porous   | Hacke & Sauter 1996          |
| Angiosperm | <i>Alnus incana</i>               | -0.20                  | -1.60                  | CE     | diffuse-porous   | Hacke et al. 2001            |
| Angiosperm | <i>Ambrosia dumosa</i>            | -0.81                  | -2.55                  | AD     | ring-porous      | Mencuccini & Comstock 1997   |
| Angiosperm | <i>Arbutus unedo</i>              | -1.18                  | -3.09                  | AD     | semi-ring-porous | Martinez-Vilalta et al. 2002 |
| Angiosperm | <i>Atriplex canescens</i>         | -1.30                  | -5.50                  | CE     | diffuse-porous   | Hacke et al. 2000a           |
| Angiosperm | <i>Atriplex confertifolia</i>     | -1.58                  | -4.25                  | CE     | diffuse-porous   | Sperry & Hacke 2002          |
| Angiosperm | <i>Betula occidentalis</i>        | -0.51                  | -1.46                  | AD     | diffuse-porous   | Sperry & Saliendra 1994      |
| Angiosperm | <i>Betula occidentalis</i>        | -1.10                  | -2.35                  | CE     | diffuse-porous   | Alder et al. 1997            |
| Angiosperm | <i>Betula occidentalis</i>        | -0.30                  | -1.30                  | CE     | diffuse-porous   | Hacke et al. 2001            |
| Angiosperm | <i>Blepharocalyx salicifolius</i> | -1.40                  | -1.93                  | AD     | diffuse-porous   | Domec et al. 2006a           |
| Angiosperm | <i>Ceanothus crassifolius</i>     | -7.87                  | -9.40                  | CE     | semi-ring-porous | Pratt et al. 2007a, b        |
| Angiosperm | <i>Ceanothus crassifolius</i>     | -2.84                  | -7.23                  | CE     | semi-ring-porous | Pratt et al. 2008            |

|            |                                    |       |       |    |                  |                                 |
|------------|------------------------------------|-------|-------|----|------------------|---------------------------------|
| Angiosperm | <i>Ceanothus cuneatus</i>          | -4.35 | -7.96 | CE | semi-ring-porous | Pratt et al. 2007a, b           |
| Angiosperm | <i>Ceanothus cuneatus</i>          | -3.01 | -7.74 | CE | semi-ring-porous | Pratt et al. 2008               |
| Angiosperm | <i>Ceanothus leucodermis</i>       | -1.65 | -3.56 | CE | semi-ring-porous | Pratt et al. 2007a, b           |
| Angiosperm | <i>Ceanothus leucodermis</i>       | -3.32 | -4.53 | CE | semi-ring-porous | Pratt et al. 2008               |
| Angiosperm | <i>Ceanothus megacarpus</i>        | -5.64 | -8.08 | CE | semi-ring-porous | Pratt et al. 2007a, b           |
| Angiosperm | <i>Ceanothus megacarpus</i>        | -2.32 | -7.42 | CE | semi-ring-porous | Pratt et al. 2008               |
| Angiosperm | <i>Ceanothus oliganthus</i>        | -2.36 | -4.13 | CE | semi-ring-porous | Pratt et al. 2007a, b           |
| Angiosperm | <i>Ceanothus oliganthus</i>        | -1.95 | -4.53 | CE | semi-ring-porous | Pratt et al. 2008               |
| Angiosperm | <i>Ceanothus spinosus</i>          | -4.11 | -4.68 | CE | semi-ring-porous | Pratt et al. 2007a, b           |
| Angiosperm | <i>Ceanothus spinosus</i>          | -1.23 | -3.16 | CE | semi-ring-porous | Pratt et al. 2008               |
| Angiosperm | <i>Cercis canadensis</i>           | -0.90 | -2.52 | AD | semi-ring-porous | Maherali et al. 2006            |
| Angiosperm | <i>Chrysothamnus nauseosus</i>     | -0.80 | -2.90 | CE | diffuse-porous   | Hacke et al. 2000a              |
| Angiosperm | <i>Chrysothamnus viscidiflorus</i> | -1.10 | -4.25 | CE | diffuse-porous   | Hacke et al. 2000a              |
| Angiosperm | <i>Cistus albidus</i>              | -2.03 | -5.78 | AD | diffuse-porous   | Martinez-Vilalta et al. 2002    |
| Angiosperm | <i>Cistus laurifolius</i>          | -0.89 | -3.65 | AD | semi-ring-porous | Martinez-Vilalta et al. 2002    |
| Angiosperm | <i>Cornus florida</i>              | -2.19 | -5.84 | AD | diffuse-porous   | Maherali et al. 2006            |
| Angiosperm | <i>Dispyros texana</i>             | -5.20 | -6.80 | AD | diffuse-porous   | Johnson 2018                    |
| Angiosperm | <i>Eucalyptus crebra</i>           | -3.98 | -5.86 | IM | diffuse-porous   | Peters et al. in review         |
| Angiosperm | <i>Eucalyptus saligna</i>          | -4.82 | -4.86 | IM | diffuse-porous   | Peters et al. in review         |
| Angiosperm | <i>Fagus sylvatica</i>             | -2.75 | -2.74 | IM | diffuse-porous   | Losso et al. 2019               |
| Angiosperm | <i>Grayia spinosa</i>              | -2.20 | -5.25 | CE | diffuse-porous   | Hacke et al. 2000a              |
| Angiosperm | <i>Hymenoclea salsola</i>          | -0.87 | -2.64 | AD | ring-porous      | Mencuccini & Comstock 1997      |
| Angiosperm | <i>Ilex aquifolium</i>             | -1.75 | -6.60 | AD | diffuse-porous   | Martinez-Vilalta et al. 2002    |
| Angiosperm | <i>Kielmeyera coriacea</i>         | -0.80 | -1.91 | AD | diffuse-porous   | Domec et al. 2006a              |
| Angiosperm | <i>Liquidambar styraciflua</i>     | -1.45 | -3.12 | AD | diffuse-porous   | Maherali et al. 2006            |
| Angiosperm | <i>Nyssa sylvatica</i>             | -1.70 | -1.82 | AD | diffuse-porous   | Maherali et al. 2006            |
| Angiosperm | <i>Olea europaea</i>               | -7.10 | -5.67 | IM | diffuse-porous   | Rodriguez-Dominguez et al. 2018 |

|            |                                |       |       |    |                  |                              |
|------------|--------------------------------|-------|-------|----|------------------|------------------------------|
| Angiosperm | <i>Oxydendrum arboreum</i>     | -1.95 | -4.54 | AD | semi-ring-porous | Maherali et al. 2006         |
| Angiosperm | <i>Phillyrea latifolia</i>     | -5.30 | -6.55 | AD | diffuse-porous   | Martinez-Vilalta et al. 2002 |
| Angiosperm | <i>Populus balsamifera</i>     | -1.00 | -1.80 | AD | diffuse-porous   | Hacke & Sauter 1996          |
| Angiosperm | <i>Prosopis velutina</i>       | -1.95 | -3.00 | AD | diffuse-porous   | Hultine et al. 2006          |
| Angiosperm | <i>Prosopis velutina</i>       | -1.54 | -1.57 | AD | diffuse-porous   | Hultine et al. 2006          |
| Angiosperm | <i>Prosopis glandulosa</i>     | -3.60 | -4.50 | AD | diffuse-porous   | Johnson 2018                 |
| Angiosperm | <i>Qualea parviflora</i>       | -1.00 | -2.23 | AD | diffuse-porous   | Domec et al. 2006a           |
| Angiosperm | <i>Quercus alba</i>            | -1.16 | -1.37 | AD | ring-porous      | Maherali et al. 2006         |
| Angiosperm | <i>Quercus falcata</i>         | -0.81 | -0.92 | AD | ring-porous      | Maherali et al. 2006         |
| Angiosperm | <i>Quercus fusiformis</i>      | -1.30 | -1.80 | AD | ring-porous      | Johnson 2018                 |
| Angiosperm | <i>Quercus fusiformis</i>      | -0.57 | -0.50 | AD | ring-porous      | McElrone et al. 2004         |
| Angiosperm | <i>Quercus ilex</i>            | -1.23 | -2.02 | DH | diffuse-porous   | Martinez-Vilalta et al. 2002 |
| Angiosperm | <i>Quercus ilex</i>            | -5.00 | -6.80 | DH | ring-porous      | Rodriguez-calcerrada 2016    |
| Angiosperm | <i>Quercus nigra</i>           | -0.86 | -1.31 | AD | ring-porous      | Maherali et al. 2006         |
| Angiosperm | <i>Quercus palustris</i>       | -3.13 | -4.56 | IM | diffuse-porous   | Peters et al. in review      |
| Angiosperm | <i>Quercus phellos</i>         | -1.24 | -1.42 | AD | ring-porous      | Maherali et al. 2006         |
| Angiosperm | <i>Quercus rubra</i>           | -1.15 | -1.61 | AD | ring-porous      | Maherali et al. 2006         |
| Angiosperm | <i>Rhamnus californica</i>     | -0.30 | -2.51 | CE | diffuse-porous   | Pratt et al. 2007a, b        |
| Angiosperm | <i>Rhamnus californica</i>     | -1.43 | -2.02 | CE | diffuse-porous   | Pratt et al. 2008            |
| Angiosperm | <i>Rhamnus crocea</i>          | -2.07 | -5.17 | CE | semi-ring-porous | Pratt et al. 2007a, b        |
| Angiosperm | <i>Rhamnus crocea</i>          | -1.44 | -5.68 | CE | semi-ring-porous | Pratt et al. 2008            |
| Angiosperm | <i>Rhamnus ilicifolia</i>      | -2.34 | -5.92 | CE | semi-ring-porous | Pratt et al. 2007a, b        |
| Angiosperm | <i>Rhamnus ilicifolia</i>      | -2.38 | -5.09 | CE | semi-ring-porous | Pratt et al. 2008            |
| Angiosperm | <i>Sideroxylon lanuginosum</i> | -0.73 | -2.60 | AD | diffuse-porous   | McElrone et al. 2004         |
| Angiosperm | <i>Solanum lycopersicum</i>    | -1.38 | -1.58 | IM |                  | Skelton et al. 2017          |
| Angiosperm | <i>Sorbus torminalis</i>       | -0.86 | -3.18 | AD | diffuse-porous   | Martinez-Vilalta et al. 2002 |
| Angiosperm | <i>Tetradymia glabrata</i>     | -2.50 | -5.50 | CE | diffuse-porous   | Hacke et al. 2000a           |

|            |                                 |        |        |    |             |                            |
|------------|---------------------------------|--------|--------|----|-------------|----------------------------|
| Angiosperm | <i>Ulmus minor</i>              | -3.00  | -3.20  | DH | ring-porous | Rodriguez-calcerrada 2016  |
| Gymnosperm | <i>Abies balsamea</i>           | -2.80  | -3.79  | CE | vesselless  | Hacke & Jansen 2009        |
| Gymnosperm | <i>Abies balsamea</i>           | -1.60  | -3.33  | CE | vesselless  | Hacke & Jansen 2009        |
| Gymnosperm | <i>Abies balsamea</i>           | -1.59  | -4.49  | CE | vesselless  | Hacke & Jansen 2009        |
| Gymnosperm | <i>Abies concolor</i>           | -3.40  | -8.40  | CE | vesselless  | Hacke et al. 2004          |
| Gymnosperm | <i>Abies lasiocarpa</i>         | -3.30  | -3.30  | CE | vesselless  | Hacke et al. 2004          |
| Gymnosperm | <i>Abies lasiocarpa</i>         | -3.14  | -4.70  | CE | vesselless  | Pittermann et al. 2006a, b |
| Gymnosperm | <i>Agathis australis</i>        | -1.10  | -2.58  | CE | vesselless  | Pittermann et al. 2006a, b |
| Gymnosperm | <i>Cedrus deodara</i>           | -6.33  | -6.77  | IM | vesselless  | Peters et al. in review    |
| Gymnosperm | <i>Dacrydium cupressiformis</i> | -1.90  | -3.08  | CE | vesselless  | Pittermann et al. 2006a, b |
| Gymnosperm | <i>Juniperus arizonica</i>      | -9.50  | -13.80 | CE | vesselless  | Willson et al. 2008        |
| Gymnosperm | <i>Juniperus ashei</i>          | -12.95 | -13.41 | CE | vesselless  | McElrone et al. 2004       |
| Gymnosperm | <i>Juniperus ashei</i>          | -4.48  | -13.41 | CE | vesselless  | McElrone et al. 2004       |
| Gymnosperm | <i>Juniperus ashei</i>          | -9.40  | -13.10 | CE | vesselless  | Willson et al. 2008        |
| Gymnosperm | <i>Juniperus barbadensis</i>    | -7.20  | -12.80 | CE | vesselless  | Willson et al. 2008        |
| Gymnosperm | <i>Juniperus deppeana</i>       | -8.80  | -8.90  | CE | vesselless  | Willson et al. 2008        |
| Gymnosperm | <i>Juniperus flaccida</i>       | -7.80  | -7.80  | CE | vesselless  | Willson et al. 2008        |
| Gymnosperm | <i>Juniperus lucayana</i>       | -6.30  | -8.30  | CE | vesselless  | Willson et al. 2008        |
| Gymnosperm | <i>Juniperus maritima</i>       | -6.35  | -7.58  | CE | vesselless  | Ogle et al 2009            |
| Gymnosperm | <i>Juniperus monosperma</i>     | -9.30  | -11.60 | CE | vesselless  | Willson et al. 2008        |
| Gymnosperm | <i>Juniperus occidentalis</i>   | -8.50  | -9.00  | CE | vesselless  | Willson et al. 2008        |
| Gymnosperm | <i>Juniperus osteosperma</i>    | -5.65  | -6.92  | AD | vesselless  | Linton et al. 1998         |
| Gymnosperm | <i>Juniperus osteosperma</i>    | -7.03  | -7.81  | CE | vesselless  | Pittermann et al. 2006a, b |
| Gymnosperm | <i>Juniperus osteosperma</i>    | -10.40 | -11.90 | CE | vesselless  | Willson et al. 2008        |
| Gymnosperm | <i>Juniperus pinchotii</i>      | -7.70  | -14.10 | CE | vesselless  | Willson et al. 2008        |
| Gymnosperm | <i>Juniperus scopulorum</i>     | -5.20  | -7.30  | CE | vesselless  | Hacke et al. 2004          |
| Gymnosperm | <i>Juniperus scopulorum</i>     | -4.96  | -8.99  | CE | vesselless  | Ogle et al 2009            |

|            |                               |       |       |    |            |                            |
|------------|-------------------------------|-------|-------|----|------------|----------------------------|
| Gymnosperm | <i>Juniperus scopulorum</i>   | -6.60 | -7.70 | CE | vesselless | Willson et al. 2008        |
| Gymnosperm | <i>Juniperus virginiana</i>   | -4.54 | -7.12 | CE | vesselless | Maherali et al. 2006       |
| Gymnosperm | <i>Juniperus virginiana</i>   | -4.90 | -5.80 | CE | vesselless | Willson et al. 2008        |
| Gymnosperm | <i>Juniperus virginiana</i>   | -4.70 | -6.60 | CE | vesselless | Willson et al. 2008        |
| Gymnosperm | <i>Picea engelmannii</i>      | -5.10 | -4.91 | CE | vesselless | Pittermann et al. 2006a, b |
| Gymnosperm | <i>Picea engelmannii</i>      | -5.00 | -8.70 | CE | vesselless | Hacke et al. 2004          |
| Gymnosperm | <i>Picea mariana</i>          | -4.46 | -4.59 | CE | vesselless | Hacke & Jansen 2009        |
| Gymnosperm | <i>Picea mariana</i>          | -3.30 | -5.33 | CE | vesselless | Hacke & Jansen 2009        |
| Gymnosperm | <i>Picea mariana</i>          | -2.17 | -5.98 | CE | vesselless | Hacke & Jansen 2009        |
| Gymnosperm | <i>Picea mariana</i>          | -5.10 | -5.98 | CE | vesselless | Pittermann et al. 2006a, b |
| Gymnosperm | <i>Pinus caribaea</i>         | -1.91 | -3.27 | CE | vesselless | Pittermann et al. 2006a, b |
| Gymnosperm | <i>Pinus contorta</i>         | -2.16 | -3.67 | CE | vesselless | Pittermann et al. 2006a, b |
| Gymnosperm | <i>Pinus echinata</i>         | -1.47 | -3.21 | AD | vesselless | Maherali et al. 2006       |
| Gymnosperm | <i>Pinus edulis</i>           | -4.20 | -7.00 | CE | vesselless | Hacke et al. 2004          |
| Gymnosperm | <i>Pinus halepensis</i>       | -0.88 | -3.11 | AD | vesselless | Oliveras et al. 2003       |
| Gymnosperm | <i>Pinus monophylla</i>       | -3.74 | -5.55 | CE | vesselless | Pittermann et al. 2006a, b |
| Gymnosperm | <i>Pinus pinea</i>            | -1.01 | -3.65 | AD | vesselless | Oliveras et al. 2003       |
| Gymnosperm | <i>Pinus ponderosa</i>        | -1.26 | -2.65 | AD | vesselless | Domec et al. 2004          |
| Gymnosperm | <i>Pinus ponderosa</i>        | -1.07 | -2.79 | AD | vesselless | Stout & Sala 2003          |
| Gymnosperm | <i>Pinus ponderosa</i>        | -0.91 | -3.43 | AD | vesselless | Stout & Sala 2003          |
| Gymnosperm | <i>Pinus sylvestris</i>       | -1.65 | -2.30 | AE | vesselless | Mencuccini et al 1997      |
| Gymnosperm | <i>Pinus taeda</i>            | -1.74 | -3.13 | AD | vesselless | Maherali et al. 2006       |
| Gymnosperm | <i>Pinus taeda</i>            | -1.23 | -3.27 | CE | vesselless | Ewers et al. 2000          |
| Gymnosperm | <i>Pinus taeda</i>            | -2.10 | -3.20 | CE | vesselless | Hacke et al. 2000b         |
| Gymnosperm | <i>Pinus taeda</i>            | -0.90 | -3.70 | CE | vesselless | Hacke et al. 2000b         |
| Gymnosperm | <i>Prumnopitys ferruginea</i> | -4.34 | -5.58 | CE | vesselless | Pittermann et al. 2006a, b |
| Gymnosperm | <i>Pseudotsuga menziesii</i>  | -1.20 | -3.30 | AD | vesselless | Domec et al. 2006b, 2009   |



|            |                              |       |       |    |            |                            |
|------------|------------------------------|-------|-------|----|------------|----------------------------|
| Gymnosperm | <i>Pseudotsuga menziesii</i> | -3.91 | -5.21 | AD | vesselless | Kavanagh et al. 1999       |
| Gymnosperm | <i>Pseudotsuga menziesii</i> | -3.88 | -5.35 | AD | vesselless | Kavanagh et al. 1999       |
| Gymnosperm | <i>Pseudotsuga menziesii</i> | -3.34 | -5.15 | AD | vesselless | Kavanagh et al. 1999       |
| Gymnosperm | <i>Pseudotsuga menziesii</i> | -3.07 | -5.26 | AD | vesselless | Kavanagh et al. 1999       |
| Gymnosperm | <i>Pseudotsuga menziesii</i> | -2.53 | -4.77 | AD | vesselless | Kavanagh et al. 1999       |
| Gymnosperm | <i>Pseudotsuga menziesii</i> | -3.93 | -4.60 | AD | vesselless | Sperry & Ikeda 1997        |
| Gymnosperm | <i>Pseudotsuga menziesii</i> | -1.75 | -5.04 | AD | vesselless | Sperry & Ikeda 1997        |
| Gymnosperm | <i>Pseudotsuga menziesii</i> | -2.65 | -4.49 | AD | vesselless | Stout & Sala 2003          |
| Gymnosperm | <i>Pseudotsuga menziesii</i> | -1.45 | -5.25 | AD | vesselless | Stout & Sala 2003          |
| Gymnosperm | <i>Sequoia sempervirens</i>  | -6.28 | -6.04 | CE | vesselless | Pittermann et al. 2006a, b |
| Gymnosperm | <i>Taxodium distichum</i>    | -0.80 | -2.14 | CE | vesselless | Pittermann et al. 2006a, b |

## References

- Alder, N.N., J. S. Sperry, and W. T. Pockman. 1996. Root and stem xylem embolisms, stomatal conductance and leaf turgor in *Acer grandidentatum* populations along a soil moisture gradient. *Oecologia* 105: 293–301.
- Alder, N.N., Pockman W.T., Sperry J.S. and Nuismer S. 1997. Use of centrifugal force in the study of xylem cavitation. *Journal of Experimental Botany* 48: 665–674.
- Domec J.-C., Scholz F.G., Bucci S.J., Meinzer F.C. Goldstein G., Villalobos-Vega R. 2006. Diurnal and seasonal variation in root xylem embolism in tropical savanna woody species: relationship to stomatal behavior and plant water potential. *Plant Cell and Environment* 29: 26-35.
- Domec, J.-C., B. Lachenbruch, and F. C. Meinzer. 2006. Bordered pit structure and function determine spatial patterns of air-seeding thresholds in xylem of Douglas-fir (*Pseudotsuga menziesii*; Pinaceae) trees. *American Journal of Botany* 93: 1588-1600.
- Domec J.-C., Warren J.M., Meinzer F.C., Lanchenbruch B. 2009. Safety factors for xylem failure by implosion and air-seeding within roots, trunks and branches of young and old conifer trees. *IAWA Journal* 30: 101-120.

- Domec, J. C., Warren, J. M., Meinzer, F. C., Brooks, J. R., & Coulombe, R. (2004). Native root xylem embolism and stomatal closure in stands of Douglas-fir and ponderosa pine: mitigation by hydraulic redistribution. *Oecologia*, 141, 7-16.
- Ewers B.E., Oren R. and Sperry J.S. 2000. Influence of nutrient versus water supply on hydraulic architecture and water balance in *Pinus taeda*. *Plant, Cell and Environment* 23: 1055–1066.
- Hacke U.G. & Jansen S. 2009. Embolism resistance of three boreal conifer species varies with pit structure. *New Phytologist* 182: 675–686.
- Hacke, U. G., J. S. Sperry, and J. Pittermann. 2000. Drought experience and cavitation resistance in six desert shrubs of the Great Basin, Utah. *Basic and Applied Ecology*. 1:31–41.
- Hacke, U. G., J. S. Sperry, B. E. Ewers, D. S. Ellsworth, K. V. R. Schäfer, and R. Oren. 2000. Influence of soil porosity on water use in *Pinus taeda*. *Oecologia* 124: 495–505.
- Hacke U., Sperry J.S., Pockman W.T., Davis S.D. and McCulloh K.A. 2001. Trends in wood density and structure are linked to prevention of xylem implosion by negative pressure. *Oecologia* 126: 457–461.
- Hacke U.G., Sperry J.S. & Pittermann J. 2004. Analysis of circular bordered pit function II. Gymnosperm tracheids with torus-margo pit membranes. *American Journal of Botany* 91: 386-400.
- Hultine, K. R., D. F. Koepke, W. T. Pockman, A. Fravolini, J. S. Sperry, and D. G. Williams. 2006. Influence of soil texture on hydraulic properties and water relations of a dominant warm-desert phreatophyte. *Tree Physiology* 26:313-323.
- Johnson, D.M., Domec, J.C., Carter Berry, Z., Schwantes, A.M., McCulloh, K.A., Woodruff, D.R., Wayne Polley, H., Wortemann, R., Swenson, J.J., Scott Mackay, D. and McDowell, N.G., 2018. Co-occurring woody species have diverse hydraulic strategies and mortality rates during an extreme drought. *Plant, Cell & Environment* 41: 576-588.
- Kavanagh K.L., Bond B.J., Aitken S.N., Gartner B.L. & Knowe S. 1999. Shoot and root vulnerability to xylem cavitation in four populations of Douglas-fir seedlings. *Tree Physiology* 19: 31-37.
- Linton, M.J., J. S. Sperry, and D. G. Williams. 1998 Limits to water transport in *Juniperus osteosperma* and *Pinus edulis*: implications for drought tolerance and regulation of transpiration. *Functional Ecology* 12:906–911.

- Losso, A., Bär, A., Dämon, B., Dullin, C., Ganthaler, A., Petruzzellis, F., Savi, T., Tromba, G., Nardini, A., Mayr, S. and Beikircher, B. 2019. Insights from in vivo micro-CT analysis: testing the hydraulic vulnerability segmentation in *Acer pseudoplatanus* and *Fagus sylvatica* seedlings. *New Phytologist*: 1831-1842.
- Maherali H., Moura C.F., Caldeira M.C., Willson C.J. & Jackson R.B. 2006. Functional coordination between leaf gas exchange and vulnerability to xylem cavitation in temperate forest trees. *Plant, Cell and Environment*, 29: 571-583.
- Martínez-Vilalta J, Prat E, Oliveras I and Piñol J. 2002. Xylem hydraulic properties of roots and stems of nine Mediterranean woody species. *Oecologia* 133: 19-29.
- McElrone, A.J., W.T. Pockman, J. Martínez-Vilalta and R.B. Jackson. 2004. Variation in xylem structure and function in stems and roots of trees to 20 m depth. *New Phytologist*. 163:507-517.
- Mencuccini, M., and J. Comstock. 1997. Vulnerability to cavitation in populations of two desert species, *Hymenoclea salsola* and *Ambrosia dumosa*, from different climatic regions. *Journal of Experimental Botany* 48:1323–1334.
- Mencuccini M, Grace J, Fioravanti M. 1997. Biomechanical and hydraulic determinants of tree structure in Scots pine: anatomical characteristics. *Tree Physiology* 17: 105-113.
- Ogle K., Barber J., Willson C. & Thompson B. 2009. Hierarchical statistical modeling of xylem vulnerability to cavitation. *New Phytologist* 182: 541–554
- Oliveras I., Martínez-Vilalta J., Jimenez-Ortiz T., Lledó M.J., Escarré A. and Piñol J. 2003. Hydraulic properties of *Pinus halepensis*, *Pinus pinea* and *Tetraclinis articulata* in a dune ecosystem of Eastern Spain. *Plant Ecology* 169: 131-141.
- Pittermann J., Sperry J.S., Hacke U.G., Wheeler J.K., Sikkema E.L. 2006. Inter-tracheid pitting and the hydraulic efficiency of conifer wood: the role of tracheid allometry and cavitation protection. *American Journal of Botany* 93: 1265–1273.
- Pittermann J., Sperry J.S., Wheeler J.K., Hacke U.G., Sikkema E. 2006. Mechanical reinforcement against tracheid implosion compromises the hydraulic efficiency of conifer xylem. *Plant, Cell and Environment* 29: 1618-1628.
- Pratt RB, Jacobsen AL, Golgotiu KA, Sperry JS, Ewers FW, Davis SD. 2007. Life history type coupled to water stress tolerance in nine Rhamnaceae species of the California chaparral. *Ecological Monographs* 77: 239-253.

- Pratt RB, Jacobsen AL, Ewers FW, Davis SD. 2007. Relationships among xylem transport, biomechanics, and storage in stems and roots of nine Rhamnaceae species of the California chaparral. *New Phytologist* 174: 787-798.
- Pratt RB, Jacobsen AL, Mohla R, Ewers FW, Davis SD. 2008. Linkage between water stress tolerance and life history type in seedlings of nine chaparral species (Rhamnaceae). *Journal of Ecology* 96: 1252-1265
- Rodríguez-Calcerrada, J., Li, M., López, R., Cano, F.J., Oleksyn, J., Atkin, O.K., Pita, P., Aranda, I. and Gil, L., 2017. Drought-induced shoot dieback starts with massive root xylem embolism and variable depletion of nonstructural carbohydrates in seedlings of two tree species. *New Phytologist* 213: 597-610.
- Skelton, R.P., Brodribb, T.J. and Choat, B., 2017. Casting light on xylem vulnerability in an herbaceous species reveals a lack of segmentation. *New Phytologist*: 561-569.
- Sperry J.S. & Hacke U.G. 2002. Desert shrub water relations with respect to soil characteristics and plant functional type. *Functional Ecology* 16: 367-378.
- Sperry J.S. & Hacke U.G. 2004. Analysis of circular bordered pit function I. Angiosperm vessels with homogenous pit membranes. *American Journal of Botany* 91: 369-385.
- Sperry, J. S., and T. Ikeda. 1997. Xylem cavitation in roots and stems of Douglas-fir and white fir. *Tree Physiology* 17:275–280.
- Sperry, J. S., and N. Z. Saliendra. 1994. Intra-and Inter-plant variation in xylem cavitation in *Betula occidentalis*. *Plant, Cell and Environment* 17:1233–1241.
- Stout D.L. & Sala A. 2003. Xylem vulnerability to cavitation in *Pseudotsuga menziesii* and *Pinus ponderosa* from contrasting habitats. *Tree Physiology* 23, 43–50.
- Tsuda, M., and M. T. Tyree. 1997. Whole plant hydraulic resistance and vulnerability segmentation in *Acer saccharinum*. *Tree Physiology* 17:351–357.
- Willson CJ, PS Manos, RB Jackson. 2008. Hydraulic traits are influenced by phylogenetic history in the drought-resistant and invasive genus *Juniperus* (Cupressaceae). *American Journal of Botany* 95:299-314.
